# Supplementary material for: Effectiveness of Artificial Intelligence Models for Cardiovascular Disease Prediction: Network Meta-Analysis
Source: Comput Intell Neurosci. 2022 Feb 24;2022:5849995. doi: 10.1155/2022/5849995 (PMC8894073; doi:10.1155/2022/5849995)
Supplement: Supplementary Materials — File 1: QUADAS-2 tool (DOCX file, 13.9 KB). File 2: characteristics of the selected studies (DOCX file, 24.0 KB). File 3: dataset used in the network meta-analysis (DOCX file, 13.6 KB). File 4: coding of the network meta-analysis using R (DOCX file, 13.6 KB). [file 5849995.f1.zip]

Archive with 4 entries (4 files):
- 5849995.f1/File 1. The QUADAS-2 tool..docx
- 5849995.f1/File 2. Characteristics of the selected studies..docx
- 5849995.f1/File 3. Dataset used in the network meta-analysis..docx
- 5849995.f1/File 4. Coding of the network meta-analysis using R..docx
